# Supplementary material
Source: MDPI journal article supplement (https://www.mdpi.com/1999-4907/14/9/1741)
Supplement: s1 [file s1]

## Supplementary Materials

**Table S1** The Pearson correlations ( $r$ ) of initial litter chemical properties, soil physicochemical properties, and soil microbial biomass with litter mass remaining (LMR, %) of leaf and fine roots.

| Litter type |      | LMR at different periods of decomposition (days) |         |        |         |         |        |       |       |       |
|-------------|------|--------------------------------------------------|---------|--------|---------|---------|--------|-------|-------|-------|
|             |      | 15                                               | 30      | 60     | 90      | 120     | 180    | 270   | 360   | 450   |
| Leaf        | LC   | 0.89**                                           | 0.84**  | 0.86** | 0.88**  | 0.85**  | 0.75*  | 0.23  | -0.37 | -0.28 |
|             | LN   | -0.88**                                          | -0.90** | -0.79* | -0.87** | -0.87** | -0.75* | -0.36 | 0.51  | 0.41  |
|             | LP   | -0.91**                                          | -0.91** | -0.81* | -0.87** | -0.87** | -0.75* | -0.39 | 0.61  | 0.4   |
|             | LC:N | 0.93**                                           | 0.92**  | 0.84** | 0.92**  | 0.91**  | 0.78*  | 0.32  | -0.49 | -0.35 |
|             | LN:P | 0.89**                                           | 0.89**  | 0.81*  | 0.85**  | 0.83*   | 0.73*  | 0.41  | -0.65 | -0.34 |
|             | SOC  | 0.82*                                            | 0.87**  | 0.92** | 0.86**  | 0.86**  | 0.90** | 0.35  | -0.46 | -0.14 |
|             | TN   | 0.63                                             | 0.69    | 0.82*  | 0.72*   | 0.72*   | 0.84** | 0.25  | -0.13 | -0.16 |
|             | TP   | 0.30                                             | 0.43    | 0.48   | 0.42    | 0.51    | 0.59   | 0.14  | -0.12 | 0.48  |
|             | B    | 0.68                                             | 0.69    | 0.79*  | 0.69    | 0.71*   | 0.73*  | 0.00  | -0.31 | 0.05  |
|             | F    | 0.52                                             | 0.47    | 0.61   | 0.51    | 0.53    | 0.52   | -0.32 | -0.13 | 0.20  |
|             | AMF  | 0.62                                             | 0.62    | 0.72*  | 0.60    | 0.65    | 0.67   | -0.09 | -0.32 | 0.10  |
|             | Act  | 0.62                                             | 0.59    | 0.70   | 0.62    | 0.64    | 0.62   | -0.15 | -0.21 | 0.17  |
|             | TMB  | 0.67                                             | 0.67    | 0.77** | 0.67    | 0.69    | 0.71*  | -0.03 | -0.30 | 0.08  |
|             | F:B  | -0.50                                            | -0.53   | -0.48  | -0.55   | -0.49   | -0.50  | -0.70 | 0.31  | 0.32  |
| Root        | LC   | -0.45                                            | -0.67   | -0.26  | 0.36    | 0.48    | 0.15   | 0.75* | 0.28  | -0.35 |
|             | LN   | -0.72*                                           | -0.63   | -0.26  | 0.43    | 0.44    | 0.57   | 0.76* | 0.46  | -0.41 |
|             | LP   | -0.68                                            | -0.77*  | -0.1   | 0.16    | 0.34    | 0.26   | 0.73* | 0.40  | -0.32 |
|             | LC:N | 0.80*                                            | 0.77*   | 0.33   | -0.41   | -0.44   | -0.36  | -0.70 | -0.31 | 0.41  |
|             | LN:P | -0.62                                            | -0.43   | -0.4   | 0.59    | 0.47    | 0.64   | 0.61  | 0.38  | -0.38 |
|             | SOC  | -0.52                                            | -0.79*  | -0.24  | 0.35    | 0.52    | 0.02   | 0.49  | 0.24  | -0.27 |
|             | TN   | -0.45                                            | -0.68   | -0.16  | 0.26    | 0.37    | -0.05  | 0.24  | 0.08  | -0.23 |
|             | TP   | -0.35                                            | -0.29   | -0.16  | 0.34    | 0.04    | -0.06  | 0.43  | -0.34 | -0.77 |
|             | B    | -0.46                                            | -0.53   | -0.02  | 0.22    | 0.29    | 0.28   | 0.49  | 0.28  | -0.37 |
|             | F    | -0.34                                            | -0.29   | 0.11   | 0.15    | 0.10    | 0.50   | 0.39  | 0.23  | -0.44 |
|             | AMF  | -0.43                                            | -0.43   | 0.11   | 0.08    | 0.13    | 0.33   | 0.58  | 0.29  | -0.45 |
|             | Act  | -0.49                                            | -0.42   | -0.08  | 0.32    | 0.32    | 0.37   | 0.45  | 0.33  | -0.36 |
|             | TMB  | -0.44                                            | -0.51   | -0.01  | 0.22    | 0.27    | 0.30   | 0.49  | 0.27  | -0.39 |
|             | F:B  | 0.35                                             | 0.67    | 0.66   | -0.58   | -0.85** | 0.45   | 0.01  | -0.24 | -0.39 |

Note: LMR, LC, LN, LP, LC:N, LN:P, SOC, TN, TP, B, F, AMF, Act, TMB, and F:B represent litter mass remaining (%), initial litter carbon, nitrogen, and phosphorus, the ratios of initial litter carbon to nitrogen and nitrogen to phosphorus, soil organic carbon, soil total nitrogen, soil total phosphorus, the biomasses of bacteria, fungi, arbuscular mycorrhizal fungi, actinomycetes, total microbial biomass, and the ratio of fungal to bacterial biomass, respectively. \* indicates significant correlations ( $p < 0.05$ ), \*\* indicates extremely significant correlations ( $p < 0.01$ ).

**Table S2** The Pearson correlations (r) of initial litter chemical properties, soil physicochemical properties, and soil microbial biomass with decomposition constants (k) of leaf litter and fine roots.

| Variations  | K of leaf litter (g g <sup>-1</sup> yr <sup>-1</sup> ) |         |         |          | K of fine root (g g <sup>-1</sup> yr <sup>-1</sup> ) |       |         |          |
|-------------|--------------------------------------------------------|---------|---------|----------|------------------------------------------------------|-------|---------|----------|
|             | 0-450d                                                 | 0-90d   | 90-180d | 180-450d | 0-450d                                               | 0-90d | 90-180d | 180-465d |
| <b>LC</b>   | 0.69                                                   | -0.84** | 0.51    | 0.56     | 0.06                                                 | -0.42 | -0.09   | 0.33     |
| <b>LN</b>   | -0.77*                                                 | 0.81*   | -0.54   | -0.73*   | 0.16                                                 | -0.52 | -0.49   | 0.46     |
| <b>LP</b>   | -0.76*                                                 | 0.79*   | -0.40   | -0.73*   | 0.19                                                 | -0.26 | -0.21   | 0.28     |
| <b>LC:N</b> | 0.77*                                                  | -0.87** | 0.61    | 0.69     | -0.33                                                | 0.50  | 0.22    | -0.41    |
| <b>LN:P</b> | 0.70                                                   | -0.77*  | 0.35    | 0.65     | 0.12                                                 | -0.64 | -0.54   | 0.47     |
| <b>SOC</b>  | 0.59                                                   | -0.86** | 0.31    | 0.59     | 0.20                                                 | -0.44 | -0.07   | 0.17     |
| <b>TN</b>   | 0.50                                                   | -0.77*  | 0.24    | 0.53     | 0.33                                                 | -0.34 | 0.00    | 0.11     |
| <b>TP</b>   | -0.04                                                  | -0.48   | 0.22    | 0.18     | 0.74*                                                | -0.38 | 0.15    | 0.66     |
| <b>B</b>    | 0.42                                                   | -0.72*  | 0.31    | 0.30     | 0.23                                                 | -0.33 | -0.37   | 0.31     |
| <b>F</b>    | 0.27                                                   | -0.56   | 0.38    | 0.03     | 0.30                                                 | -0.25 | -0.58   | 0.43     |
| <b>AMF</b>  | 0.36                                                   | -0.63   | 0.22    | 0.24     | 0.26                                                 | -0.19 | -0.40   | 0.40     |
| <b>Act</b>  | 0.32                                                   | -0.64   | 0.37    | 0.16     | 0.19                                                 | -0.41 | -0.50   | 0.32     |
| <b>TMB</b>  | 0.40                                                   | -0.70   | 0.31    | 0.27     | 0.24                                                 | -0.32 | -0.39   | 0.33     |
| <b>F:B</b>  | -0.41                                                  | 0.50    | -0.12   | -0.59    | 0.32                                                 | 0.59  | -0.60   | 0.48     |

Note: please see table S1 for abbreviations. \* indicates significant correlations ( $p < 0.05$ ), \*\* indicates extremely significant correlations ( $p < 0.01$ ).

**Table S3** The Pearson correlations (r) of initial litter chemical properties, soil physicochemical properties, and soil microbial biomass with litter carbon (C) remaining (%) of leaf and fine roots.

| Litter type |      | Litter C remaining at different periods of decomposition (days) |         |         |         |        |        |       |        |        |
|-------------|------|-----------------------------------------------------------------|---------|---------|---------|--------|--------|-------|--------|--------|
|             |      | 15                                                              | 30      | 60      | 90      | 120    | 180    | 270   | 360    | 450    |
| Leaf        | LC   | 0.91**                                                          | 0.76*   | 0.82*   | 0.85**  | 0.72*  | 0.69   | 0.17  | -0.49  | -0.36  |
|             | LN   | -0.86**                                                         | -0.91** | -0.80*  | -0.86** | -0.77* | -0.79* | -0.32 | 0.54   | 0.43   |
|             | LP   | -0.90**                                                         | -0.88** | -0.81*  | -0.85** | -0.76* | -0.77* | -0.36 | 0.67   | 0.45   |
|             | LC:N | 0.93**                                                          | 0.90**  | 0.84**  | 0.90**  | 0.78*  | 0.79*  | 0.27  | -0.55  | -0.39  |
|             | LN:P | 0.92**                                                          | 0.83*   | 0.79*   | 0.83*   | 0.73*  | 0.73*  | 0.35  | -0.73* | -0.40  |
|             | SOC  | 0.91**                                                          | 0.74*   | 0.88**  | 0.85**  | 0.88** | 0.83*  | 0.29  | -0.54  | -0.23  |
|             | TN   | 0.69                                                            | 0.59    | 0.79*   | 0.73*   | 0.82*  | 0.75*  | 0.22  | -0.20  | -0.23  |
|             | TP   | 0.48                                                            | 0.24    | 0.45    | 0.40    | 0.59   | 0.54   | 0.19  | -0.09  | 0.45   |
|             | B    | 0.74*                                                           | 0.53    | 0.75*   | 0.67    | 0.71   | 0.60   | -0.05 | -0.39  | -0.07  |
|             | F    | 0.53                                                            | 0.32    | 0.57    | 0.48    | 0.49   | 0.35   | -0.37 | -0.19  | 0.07   |
|             | AMF  | 0.65                                                            | 0.47    | 0.70    | 0.58    | 0.65   | 0.53   | -0.12 | -0.37  | -0.03  |
|             | Act  | 0.67                                                            | 0.41    | 0.66    | 0.58    | 0.59   | 0.47   | -0.18 | -0.29  | 0.05   |
|             | TMB  | 0.72*                                                           | 0.51    | 0.74*   | 0.65    | 0.69   | 0.57   | -0.08 | -0.38  | -0.05  |
|             | F:B  | -0.61                                                           | -0.50   | -0.44   | -0.56   | -0.47  | -0.55  | -0.66 | 0.40   | 0.31   |
| Root        | LC   | -0.60                                                           | -0.90** | -0.87** | -0.79*  | -0.76* | -0.64  | -0.44 | 0.13   | -0.57  |
|             | LN   | -0.54                                                           | -0.65   | -0.65   | -0.54   | -0.51  | -0.14  | -0.52 | 0.37   | -0.55  |
|             | LP   | -0.40                                                           | -0.55   | -0.67   | -0.40   | -0.42  | -0.13  | -0.62 | 0.36   | -0.48  |
|             | LC:N | 0.48                                                            | 0.53    | 0.59    | 0.39    | 0.40   | 0.19   | 0.63  | -0.22  | 0.55   |
|             | LN:P | -0.56                                                           | -0.60   | -0.53   | -0.54   | -0.47  | -0.19  | -0.35 | 0.25   | -0.48  |
|             | SOC  | -0.61                                                           | -0.76*  | -0.60   | -0.33   | -0.35  | -0.31  | -0.69 | 0.19   | -0.46  |
|             | TN   | -0.42                                                           | -0.45   | -0.25   | 0.03    | -0.03  | -0.05  | -0.67 | 0.11   | -0.34  |
|             | TP   | -0.21                                                           | -0.49   | -0.08   | -0.21   | -0.34  | -0.42  | -0.14 | -0.32  | -0.78* |
|             | B    | -0.43                                                           | -0.61   | -0.39   | -0.24   | -0.27  | 0.00   | -0.53 | 0.34   | -0.48  |
|             | F    | -0.23                                                           | -0.44   | -0.12   | -0.13   | -0.15  | 0.27   | -0.42 | 0.34   | -0.46  |
|             | AMF  | -0.28                                                           | -0.53   | -0.36   | -0.27   | -0.31  | 0.06   | -0.41 | 0.37   | -0.52  |
|             | Act  | -0.47                                                           | -0.56   | -0.32   | -0.17   | -0.19  | 0.07   | -0.42 | 0.39   | -0.43  |
|             | TMB  | -0.41                                                           | -0.60   | -0.36   | -0.23   | -0.26  | 0.02   | -0.51 | 0.33   | -0.49  |
|             | F:B  | 0.85**                                                          | 0.53    | 0.59    | 0.09    | 0.05   | 0.57   | 0.45  | -0.05  | -0.16  |

Note: please see table S1 for abbreviations. \* indicates significant correlations ( $p < 0.05$ ), \*\* indicates extremely significant correlations ( $p < 0.01$ ).

**Table S4** The Pearson correlations (r) of initial litter chemical properties, soil physicochemical properties, and soil microbial biomass with litter nitrogen (N) remaining (%) of leaf and fine roots.

| Litter type |      | Litter N remaining at different periods of decomposition (days) |       |        |         |         |         |         |         |        |
|-------------|------|-----------------------------------------------------------------|-------|--------|---------|---------|---------|---------|---------|--------|
|             |      | 15                                                              | 30    | 60     | 90      | 120     | 180     | 270     | 360     | 450    |
| Leaf        | LC   | -0.14                                                           | -0.02 | 0.47   | 0.87*   | 0.73*   | 0.65    | 0.26    | -0.33   | -0.33  |
|             | LN   | -0.58                                                           | -0.29 | -0.79* | -0.86*  | -0.93** | -0.84** | -0.40   | 0.39    | 0.36   |
|             | LP   | -0.36                                                           | -0.06 | -0.60  | -0.84*  | -0.86** | -0.79*  | -0.43   | 0.51    | 0.38   |
|             | LC:N | 0.42                                                            | 0.22  | 0.77*  | 0.93**  | 0.93**  | 0.83*   | 0.36    | -0.39   | -0.32  |
|             | LN:P | 0.20                                                            | -0.06 | 0.51   | 0.83*   | 0.79*   | 0.75*   | 0.43    | -0.58   | -0.35  |
|             | SOC  | -0.20                                                           | 0.24  | 0.58   | 0.86*   | 0.72*   | 0.74*   | 0.35    | -0.46   | -0.26  |
|             | TN   | -0.42                                                           | 0.41  | 0.61   | 0.66    | 0.57    | 0.60    | 0.25    | -0.18   | -0.31  |
|             | TP   | 0.02                                                            | 0.68  | 0.32   | 0.54    | 0.44    | 0.47    | 0.15    | -0.14   | 0.40   |
|             | B    | -0.37                                                           | 0.17  | 0.31   | 0.75*   | 0.54    | 0.44    | -0.02   | -0.37   | -0.11  |
|             | F    | -0.40                                                           | 0.16  | 0.10   | 0.63    | 0.36    | 0.17    | -0.34   | -0.20   | 0.02   |
|             | AMF  | -0.34                                                           | 0.16  | 0.21   | 0.67    | 0.48    | 0.35    | -0.11   | -0.38   | -0.08  |
|             | Act  | -0.42                                                           | 0.12  | 0.16   | 0.70    | 0.46    | 0.32    | -0.15   | -0.26   | 0.02   |
|             | TMB  | -0.38                                                           | 0.17  | 0.28   | 0.74*   | 0.52    | 0.42    | -0.04   | -0.36   | -0.09  |
|             | F:B  | 0.11                                                            | 0.08  | -0.49  | -0.46   | -0.44   | -0.64   | -0.72*  | 0.24    | 0.28   |
| Root        | LC   | -0.43                                                           | -0.16 | -0.65  | -0.60   | -0.74*  | -0.84** | -0.69   | -0.45   | -0.56  |
|             | LN   | -0.74*                                                          | -0.53 | -0.66  | -0.80*  | -0.89** | -0.88** | -0.95** | -0.55   | -0.78* |
|             | LP   | -0.71*                                                          | -0.45 | -0.69  | -0.86** | -0.83*  | -0.89** | -0.87** | -0.59   | -0.77* |
|             | LC:N | 0.87**                                                          | 0.48  | 0.70   | 0.84**  | 0.88*** | 0.93**  | 0.97**  | 0.69    | 0.88** |
|             | LN:P | -0.62                                                           | -0.42 | -0.51  | -0.58   | -0.74*  | -0.70   | -0.81*  | -0.42   | -0.62  |
|             | SOC  | -0.55                                                           | -0.20 | -0.42  | -0.54   | -0.59   | -0.78*  | -0.77*  | -0.59   | -0.63  |
|             | TN   | -0.58                                                           | -0.24 | -0.22  | -0.41   | -0.39   | -0.57   | -0.66   | -0.62   | -0.60  |
|             | TP   | -0.80*                                                          | -0.54 | -0.51  | -0.39   | -0.55   | -0.60   | -0.49   | -0.85** | -0.80* |
|             | B    | -0.60                                                           | -0.49 | -0.37  | -0.55   | -0.59   | -0.65   | -0.74*  | -0.57   | -0.65  |
|             | F    | -0.59                                                           | -0.66 | -0.23  | -0.46   | -0.50   | -0.45   | -0.67   | -0.54   | -0.62  |
|             | AMF  | -0.63                                                           | -0.63 | -0.47  | -0.63   | -0.65   | -0.64   | -0.70   | -0.57   | -0.68  |
|             | Act  | -0.60                                                           | -0.53 | -0.33  | -0.51   | -0.57   | -0.60   | -0.73*  | -0.51   | -0.61  |
|             | TMB  | -0.60                                                           | -0.51 | -0.36  | -0.55   | -0.59   | -0.63   | -0.74*  | -0.58   | -0.65  |
|             | F:B  | -0.05                                                           | -0.64 | 0.02   | 0.00    | 0.03    | 0.40    | 0.27    | -0.04   | -0.07  |

Note: please see table S1 for abbreviations. \* indicates significant correlations ( $p < 0.05$ ), \*\* indicates extremely significant correlations ( $p < 0.01$ ). \*\*\* indicates significant correlations ( $p < 0.001$ ).

**Table S5** The Pearson correlations (r) of initial litter chemical properties, soil physicochemical properties, and soil microbial biomass with litter phosphorus (P) remaining (%) of leaf and fine roots.

| Litter type |      | Litter P remaining at different periods of decomposition (days) |        |        |        |         |        |         |       |        |
|-------------|------|-----------------------------------------------------------------|--------|--------|--------|---------|--------|---------|-------|--------|
|             |      | 15                                                              | 30     | 60     | 90     | 120     | 180    | 270     | 360   | 450    |
| Leaf        | LC   | 0.66                                                            | 0.42   | 0.79*  | 0.92** | 0.79*   | 0.65   | 0.28    | -0.01 | 0.43   |
|             | LN   | -0.67                                                           | -0.55  | -0.80* | -0.83* | -0.91*  | -0.82* | -0.41   | -0.07 | -0.42  |
|             | LP   | -0.71*                                                          | -0.59  | -0.82* | -0.88* | -0.90** | -0.79* | -0.44   | 0.01  | -0.44  |
|             | LC:N | 0.75*                                                           | 0.58   | 0.86*  | 0.90** | 0.92**  | 0.81*  | 0.38    | 0.05  | 0.48   |
|             | LN:P | 0.75*                                                           | 0.61   | 0.84*  | 0.89** | 0.88**  | 0.76*  | 0.44    | -0.11 | 0.42   |
|             | SOC  | 0.35                                                            | 0.08   | 0.90** | 0.95** | 0.84*   | 0.78*  | 0.37    | -0.29 | 0.29   |
|             | TN   | -0.05                                                           | -0.30  | 0.81*  | 0.75   | 0.65    | 0.63   | 0.27    | -0.19 | 0.06   |
|             | TP   | -0.03                                                           | -0.46  | 0.32   | 0.53   | 0.45    | 0.50   | 0.13    | -0.19 | 0.52   |
|             | B    | 0.14                                                            | -0.16  | 0.75   | 0.82*  | 0.60    | 0.49   | 0.00    | -0.30 | 0.37   |
|             | F    | 0.00                                                            | -0.29  | 0.53   | 0.65   | 0.35    | 0.21   | -0.32   | -0.26 | 0.38   |
|             | AMF  | 0.02                                                            | -0.26  | 0.69   | 0.74   | 0.52    | 0.40   | -0.09   | -0.31 | 0.38   |
|             | Act  | 0.17                                                            | -0.18  | 0.61   | 0.75   | 0.48    | 0.35   | -0.14   | -0.21 | 0.49   |
|             | TMB  | 0.13                                                            | -0.17  | 0.73   | 0.81*  | 0.57    | 0.46   | -0.02   | -0.30 | 0.38   |
|             | F:B  | -0.65                                                           | -0.54  | -0.48  | -0.55  | -0.60   | -0.63  | -0.73   | -0.02 | -0.07  |
| Root        | LC   | -0.37                                                           | -0.42  | -0.39  | -0.43  | -0.36   | -0.35  | -0.08   | -0.23 | -0.44  |
|             | LN   | -0.50                                                           | -0.58  | -0.69  | -0.54  | -0.47   | -0.31  | -0.41   | -0.25 | -0.59  |
|             | LP   | -0.71*                                                          | -0.72* | -0.70  | -0.83* | -0.74*  | -0.74* | -0.72*  | -0.30 | -0.73* |
|             | LC:N | 0.70                                                            | 0.59   | 0.82*  | 0.69   | 0.63    | 0.51   | 0.60    | 0.40  | 0.74*  |
|             | LN:P | -0.24                                                           | -0.29  | -0.52  | -0.19  | -0.16   | 0.09   | -0.05   | -0.18 | -0.35  |
|             | SOC  | -0.52                                                           | -0.50  | -0.43  | -0.53  | -0.49   | -0.57  | -0.70   | -0.31 | -0.53  |
|             | TN   | -0.57                                                           | -0.46  | -0.47  | -0.51  | -0.51   | -0.57  | -0.93** | -0.37 | -0.55  |
|             | TP   | -0.80*                                                          | -0.41  | -0.57  | -0.36  | -0.38   | -0.25  | -0.51   | -0.64 | -0.78* |
|             | B    | -0.54                                                           | -0.62  | -0.47  | -0.51  | -0.49   | -0.46  | -0.79*  | -0.28 | -0.57  |
|             | F    | -0.45                                                           | -0.63  | -0.53  | -0.39  | -0.43   | -0.23  | -0.77*  | -0.31 | -0.53  |
|             | AMF  | -0.63                                                           | -0.73* | -0.52  | -0.60  | -0.57   | -0.51  | -0.79*  | -0.29 | -0.66  |
|             | Act  | -0.47                                                           | -0.53  | -0.41  | -0.38  | -0.34   | -0.30  | -0.73*  | -0.19 | -0.50  |
|             | TMB  | -0.53                                                           | -0.63  | -0.47  | -0.50  | -0.48   | -0.44  | -0.79*  | -0.29 | -0.58  |
|             | F:B  | -0.13                                                           | -0.33  | -0.30  | -0.08  | -0.21   | 0.21   | 0.03    | -0.21 | -0.22  |

Note: please see table S1 for abbreviations. \* indicates significant correlations ( $p < 0.05$ ), \*\* indicates extremely significant correlations ( $p < 0.01$ ).
